# Supplementary material for: Accuracy and Clinical Impact of Estimating Low-Density Lipoprotein-Cholesterol at High and Low Levels by Different Equations
Source: MDPI journal article supplement (doi:10.3390/biomedicines10123156), 2022-12-06
Supplement: s1 [file s1]

**Supplemental Table S1. Lipid values and demographic characteristics of dataset**

|          | min    | max   | Median (IQR)  | Mean (SD)    |
|----------|--------|-------|---------------|--------------|
| ApoB*    | 5      | 377   | 96 (78-117)   | 99.4 (31.9)  |
| HDL-C    | 2      | 201   | 44 (36-54)    | 46.2 (15.3)  |
| TC       | 27     | 819   | 191 (159-227) | 196.4 (56.2) |
| TG       | 5      | 1984  | 131 (89-207)  | 181.2 (172)  |
| BQ-LDL-C | 7      | 678   | 113 (88-142)  | 117.8 (44)   |
| NonHDL-C | 12     | 765   | 143 (113-179) | 150.3 (54.8) |
| F-LDL-C  | -308.2 | 721.8 | 110 (83-141)  | 114 (48.8)   |
| M-LDL-C  | -84.3  | 724.2 | 115 (90-145)  | 120.1 (46)   |
| eM-LDL-C | -45.8  | 724.2 | 115 (90-145)  | 120 (45.8)   |
| S-LDL-C  | -14.1  | 699.6 | 113 (87-144)  | 118.2 (45.7) |
| AGE      | 18     | 90    | 55 (45-65)    | 54.6 (15)    |

% Male = 51.5    n = 39,956    \*n=24,463

**Supplemental Table S2. Equations for calculating LDL-C**

$$Friedewald\ LDLC = TC - HDLC - \left( \frac{TG}{5} \right)$$

$$Martin\ LDLC = TC - HDLC - \left( \frac{TG}{factor} \right)$$

$$Sampson\ LDLC = \frac{TC}{0.948} - \frac{HDLC}{0.971} - \left( \frac{TG}{8.56} + \frac{(TG \times NonHDL-C)}{2140} - \frac{TG^2}{16100} \right) - 9.44$$

**Supplemental Table S3. Comparison between equations for accuracy**

| <b>TG 0-400 mg/dL</b>         |                  |              |                |                                  |                       |
|-------------------------------|------------------|--------------|----------------|----------------------------------|-----------------------|
| <b>Response1</b>              | <b>Response2</b> | <b>Kappa</b> | <b>Std Err</b> | <b>Bowker Symmetry ChiSquare</b> | <b>Bowker P-Value</b> |
| <b>BQ LDL-C &lt;70 mg/dL</b>  |                  |              |                |                                  |                       |
| S LDL -C                      | F LDL -C         | 0.9098       | 0.0031         | 653.9                            | <0.0001               |
| S LDL -C                      | M LDL -C         | 0.9358       | 0.0027         | 240.1                            | <0.0001               |
| F LDL -C                      | M LDL -C         | 0.8504       | 0.0039         | 885.0                            | <0.0001               |
| <b>BQ LDL-C &lt;190 mg/dL</b> |                  |              |                |                                  |                       |
| S LDL -C                      | F LDL -C         | 0.9668       | 0.0027         | 146.0                            | <0.0001               |
| S LDL -C                      | M LDL -C         | 0.9379       | 0.0036         | 39.6                             | <0.0001               |
| F LDL -C                      | M LDL -C         | 0.9565       | 0.0031         | 34.6                             | <0.0001               |
| <b>TG 401-800 mg/dL</b>       |                  |              |                |                                  |                       |
| <b>Response1</b>              | <b>Response2</b> | <b>Kappa</b> | <b>Std Err</b> | <b>Bowker Symmetry ChiSquare</b> | <b>Bowker P-Value</b> |
| <b>BQ LDL-C &lt;70 mg/dL</b>  |                  |              |                |                                  |                       |
| S LDL -C                      | F LDL -C         | 0.6731       | 0.0145         | 359.0                            | <0.0001               |
| S LDL -C                      | M LDL -C         | 0.6896       | 0.0146         | 265.0                            | <0.0001               |
| F LDL -C                      | M LDL -C         | 0.4243       | 0.0136         | 624.0                            | <0.0001               |
| S LDL -C                      | eM LDL -C        | 0.6768       | 0.0146         | 276.0                            | <0.0001               |
| F LDL -C                      | eM LDL -C        | 0.4147       | 0.0134         | 635.0                            | <0.0001               |
| M LDL -C                      | eM LDL -C        | 0.9415       | 0.0083         | 2.7                              | 0.8454*               |
| <b>BQ LDL-C &lt;190 mg/dL</b> |                  |              |                |                                  |                       |
| S LDL -C                      | F LDL -C         | 0.9544       | 0.0112         | 16.0                             | 0.0138                |
| S LDL -C                      | M LDL -C         | 0.6943       | 0.0232         | 133.0                            | <0.0001               |
| F LDL -C                      | M LDL -C         | 0.7368       | 0.0219         | 117.0                            | <0.0001               |
| S LDL -C                      | eM LDL -C        | 0.7290       | 0.0226         | 113.0                            | <0.0001               |
| F LDL -C                      | eM LDL -C        | 0.7727       | 0.0210         | 97.0                             | <0.0001               |
| M LDL -C                      | eM LDL -C        | 0.9563       | 0.0093         | 18.2                             | 0.0058                |

Supplemental Figure S1

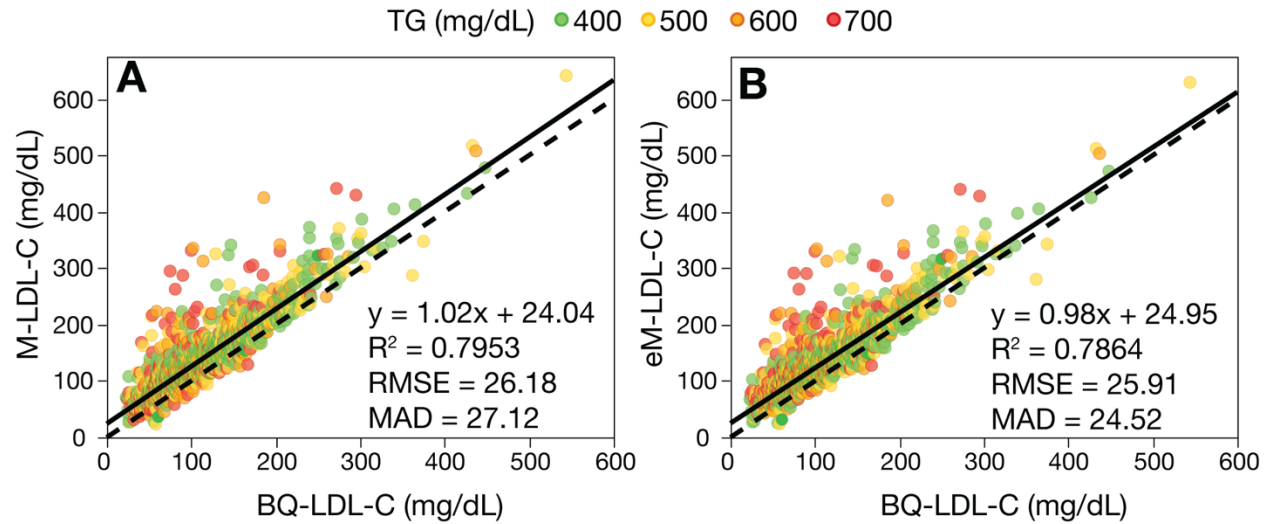

**Figure S1. Comparison of estimated LDL-C versus BQ-LDL-C.** LDL-C was calculated for patients (N=2267) with a wide range of LDL-C values and TG 400–800 mg/dL by the M-LDL-C (panel A), and eM-LDL-C (Panel B) and plotted against LDL-C as measured by BQ reference method (BQ-LDL-C). Solid lines are the linear fit for indicated regression equations. Dotted lines are lines of identity. Results are color coded by TG level with the value in the legend (mg/dL) indicating the start of each interval.

## Supplemental Figure S2

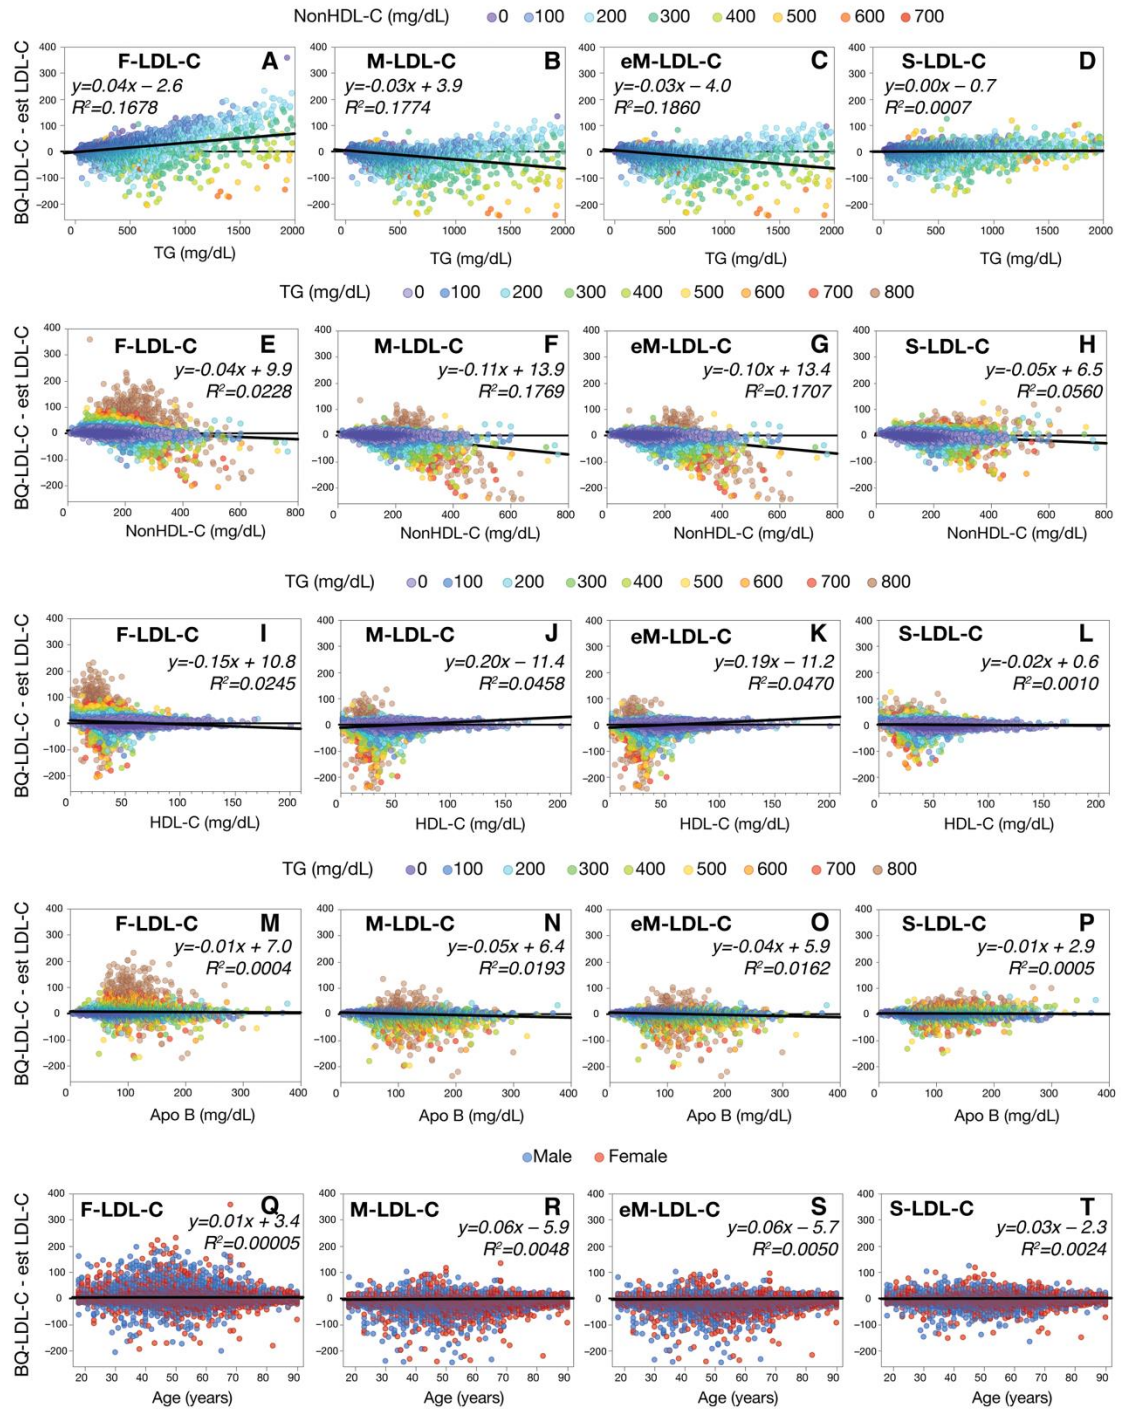

**Figure S2. Residual error plots of estimated LDL-C versus BQ-LDL-C.** LDL-C was calculated from the results of a standard lipid panel from a general population (N=39,956) with a wide range

of LDL-C values by F-LDL-C (Panel A, E, I, M and Q), and M-LDL-C (Panels B, F, J, N and R), eM-LDL-C (Panels C, G, K, O and S) and S-LDL-C (Panels D, H, L, P and T). The difference from LDL-C as measured by the BQ reference method was plotted for the indicated independent variables. Results are color coded by nonHDL-C level (Panels A-D), triglyceride level (Panels E-P) with the value in the legend (mg/dL) indicating the start of each interval or by sex (Panels Q-T, blue = male, red = female).

Supplemental Figure S3

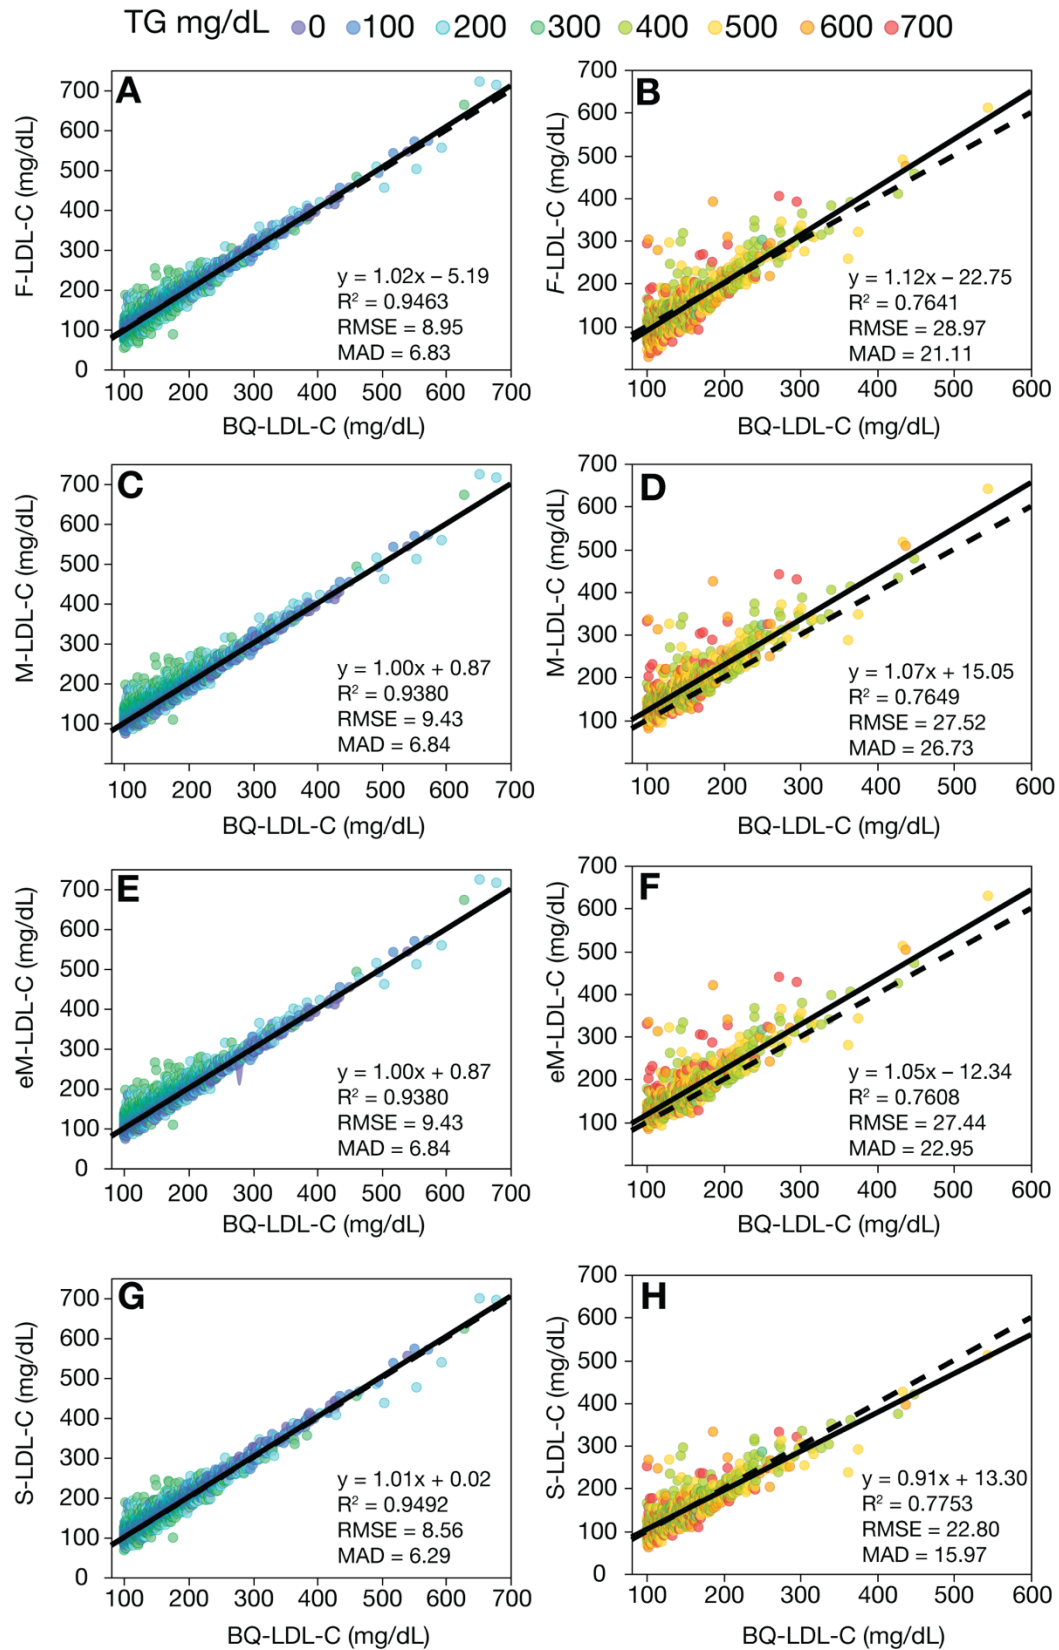

**Figure S3. Comparison of estimated LDL-C versus BQ-LDL-C.** LDL-C was calculated from the results of a standard lipid panel from a general population (N=25,311) with a wide range of LDL-C >100 mg/dL by F-LDL-C (Panels A, B), M-LDL-C (Panels C, D), eM-LDL-C (Panels E, F) and S-LDL-C (Panels G, H) equations and plotted against LDL-C as measured by BQ reference method (BQ-LDL-C) for low TG <400 mg/dL (N=24,142, Panels A, C, E G) and for high TG 400–800 mg/dL (N=1169, Panels B, D, F and H). Solid lines are the linear fits for the indicated regression equations. Dotted lines are lines of identity. Results are color coded by TG level with the value in the legend (mg/dL) indicating the start of each interval.
